# Supplementary material
Source: Springer Nature journal article supplement (https://www.springermedizin.de/resource/supplementary/13221_2013_93_MOESM4_ESM.pdf/9680910)

# VEGF + EGF + IGF-I + FGF2

**A**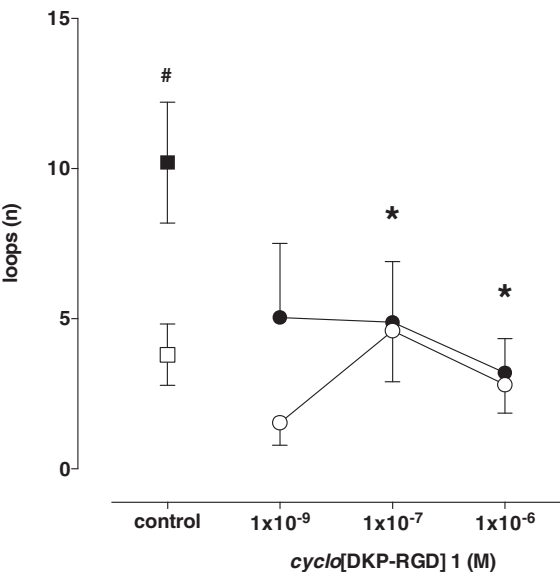**B**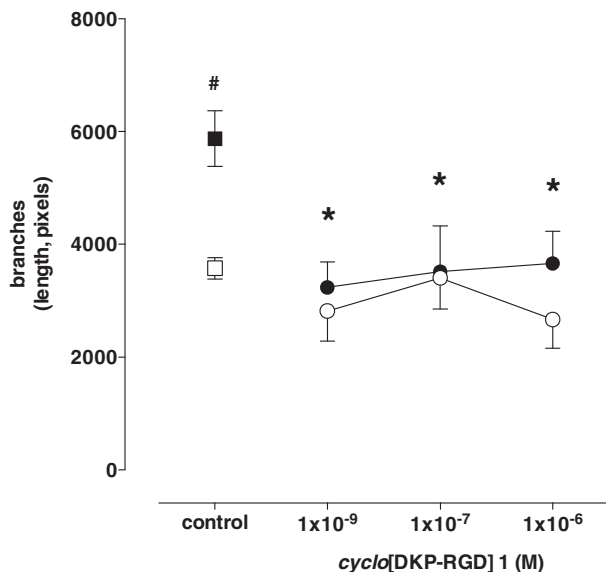

# IL-8

**A**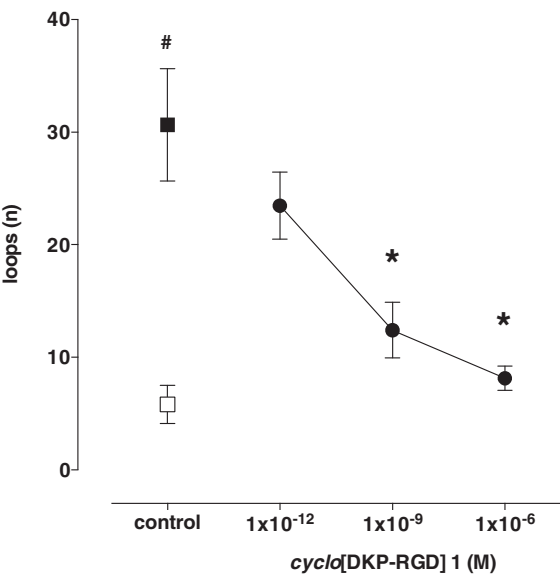**B**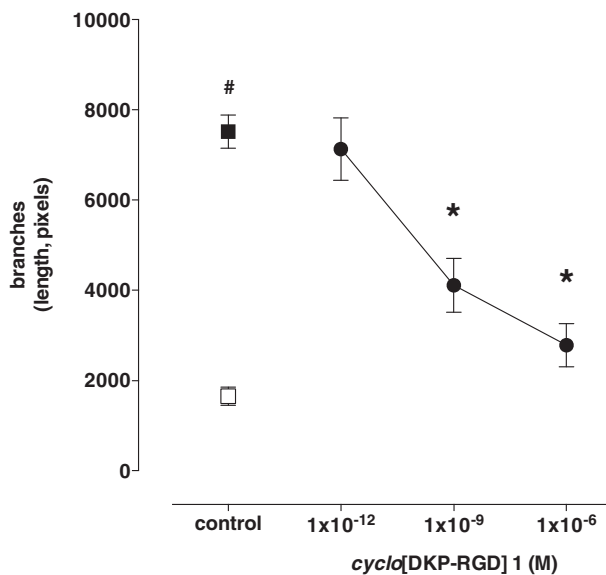

Supplement: MOESM4 [file 9680910]
